# Supplementary material for: A Novel Noninvasive Technique for Intracranial Pressure Waveform Monitoring in Critical Care
Source: MDPI journal article supplement (doi:10.3390/jpm11121302), 2021-12-05
Supplement: s1 [file s1]

# A NOVEL NONINVASIVE TECHNIQUE FOR INTRACRANIAL COMPLIANCE MONITORING IN NEUROCRITICAL CARE

\*Corresponding author:  
Sérgio Brasil, MD, PhD  
Division of Neurosurgery - University of São Paulo  
255 Enéas Aguiar Street  
Sao Paulo  
Zipcode 05403000  
sbrasil@alumni.usp.br

**Supplemental Table S1.** STARD 2015 criteria for the study structure.

| Section & Topic     | No       | Item                                                                                                                                                               | page #   |
|---------------------|----------|--------------------------------------------------------------------------------------------------------------------------------------------------------------------|----------|
| <b>TITLE</b>        |          |                                                                                                                                                                    |          |
|                     | <b>1</b> | Identification as a study of diagnostic accuracy using at least one measure of accuracy (such as correlation, sensitivity, specificity, predictive values, or AUC) | <b>1</b> |
| <b>ABSTRACT</b>     |          |                                                                                                                                                                    |          |
|                     | <b>2</b> | Structured summary of study design, methods, results, and conclusions (for specific guidance, see STARD for Abstracts)                                             | <b>2</b> |
| <b>INTRO</b>        |          |                                                                                                                                                                    |          |
|                     | <b>3</b> | Scientific and clinical background, including the intended use and clinical role of the index test                                                                 | <b>3</b> |
|                     | <b>4</b> | Study objectives and hypotheses                                                                                                                                    | <b>4</b> |
| <b>METHODS</b>      |          |                                                                                                                                                                    |          |
| <i>Study design</i> | <b>5</b> | Whether data collection was planned before the index test and reference standard were performed (prospective study) or after (retrospective study)                 | <b>4</b> |
| <i>Participants</i> | <b>6</b> | Eligibility criteria                                                                                                                                               | <b>4</b> |
|                     | <b>7</b> | On what basis potentially eligible participants were identified (such as symptoms, results from previous tests, inclusion in registry)                             | <b>4</b> |

|                     |            |                                                                                                                                                        |          |
|---------------------|------------|--------------------------------------------------------------------------------------------------------------------------------------------------------|----------|
|                     | <b>8</b>   | Where and when potentially eligible participants were identified (setting, location and dates)                                                         | <b>5</b> |
|                     | <b>9</b>   | Whether participants formed a consecutive, random or convenience series                                                                                | <b>5</b> |
| <i>Test methods</i> | <b>10a</b> | Index test, in sufficient detail to allow replication                                                                                                  | <b>7</b> |
|                     | <b>10b</b> | Reference standard, in sufficient detail to allow replication                                                                                          | <b>6</b> |
|                     | <b>11</b>  | Rationale for choosing the reference standard (if alternatives exist)                                                                                  | <b>6</b> |
|                     | <b>12a</b> | Definition of and rationale for test positivity cut-offs or result categories of the index test, distinguishing pre-specified from exploratory         | <b>6</b> |
|                     | <b>12b</b> | Definition of and rationale for test positivity cut-offs or result categories of the reference standard, distinguishing pre-specified from exploratory | <b>6</b> |
|                     | <b>13a</b> | Whether clinical information and reference standard results were available to the performers/readers of the index test                                 | <b>6</b> |
|                     | <b>13b</b> | Whether clinical information and index test results were available to the assessors of the reference standard                                          | <b>6</b> |
